# Supplementary material for: Simultaneous recognition of cysteine and cytosine using thiophene-based organic nanoparticles decorated with Au NPs and bio-imaging of cells
Source: Royal Society of Chemistry journal article supplement (doi:10.1039/c9pp00060g), 2019-05-06
Supplement: c9pp00060g1.pdf [file c9pp00060g1.pdf]

**Simultaneous recognition of cysteine and cytosine using  
thiophene based organic nanoparticles decorated with Au NPs  
and bio-imaging for cells**

Carlos Alberto Huerta-Aguilar<sup>a, b</sup>, Brayan Ramírez-Guzmán<sup>b</sup>, Thangarasu Pandiyan<sup>a\*</sup>,  
Jayanthi Narayanan<sup>b</sup> and Narinder Singh<sup>c</sup>

<sup>a</sup> Facultad de Química, Universidad Nacional Autónoma de México (UNAM), Ciudad Universitaria, Coyoacán, 04510 México D.F., México

<sup>b</sup> División de Nanotecnología, Universidad Politécnica del Valle de México, Av. Mexiquense, C.P. 54910 Tultitlán, Estado de México, México.

<sup>c</sup> Department of chemistry, Indian Institute of Technology (IIT), Ropar, India

**Supplementary Information**

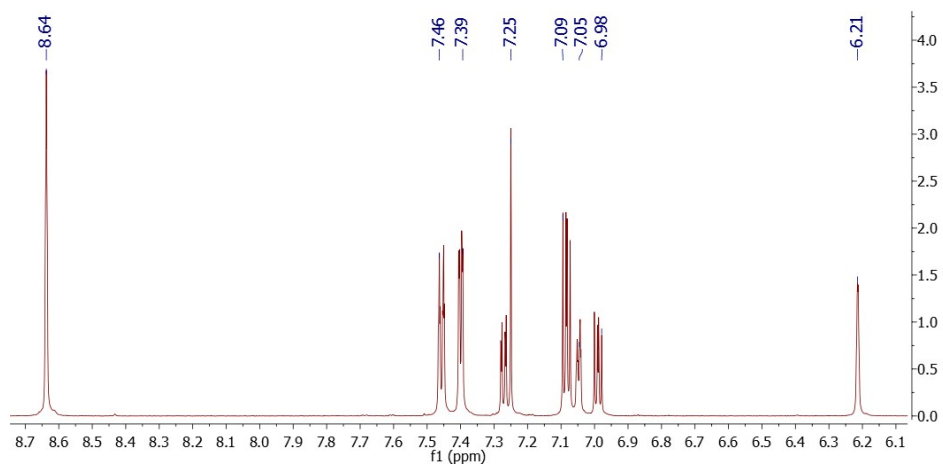

**Figure S1.** <sup>1</sup>H NMR spectra (400 MHz) of BMTM in CDCl<sub>3</sub>.

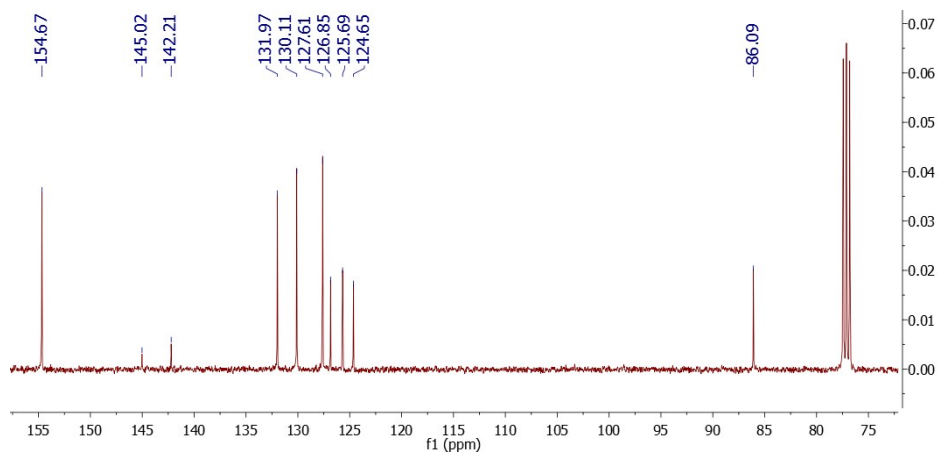

**Figure S2.** <sup>13</sup>C NMR spectra (400 MHz) of BMTM in CDCl<sub>3</sub>.

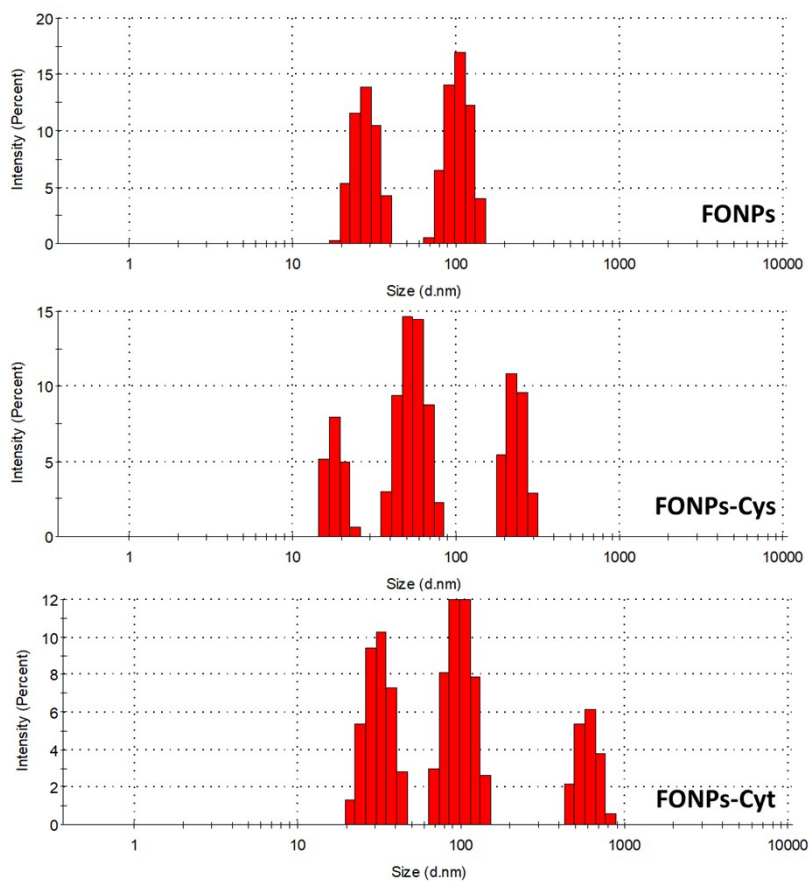

**Figure S3.** DLS analysis for FONPs and its interaction with cysteine and cytosine

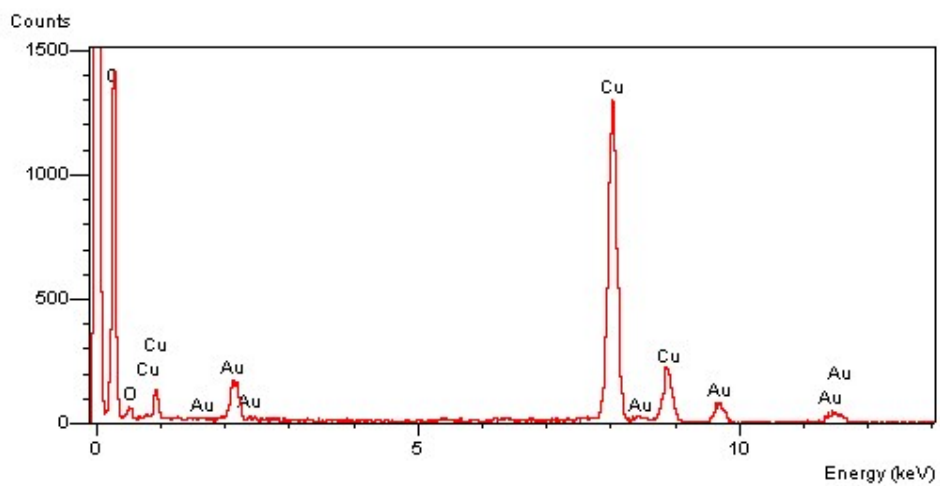

**Figure S4.** Energy Dispersive X-Ray Spectroscopy (EDS) spectra for FONPs.

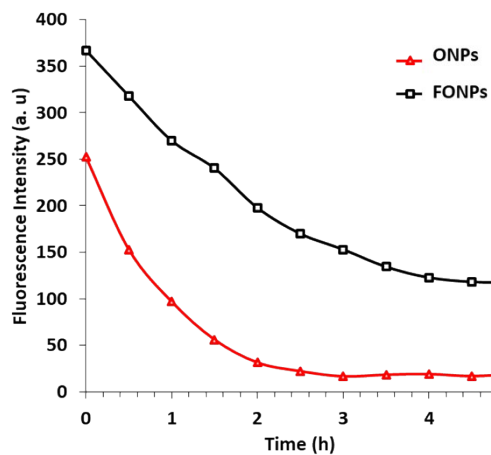

**Figure S5.** Fluorescence intensity against time at 425 nm emission for ONPs and FONPs (100  $\mu$ M) in water

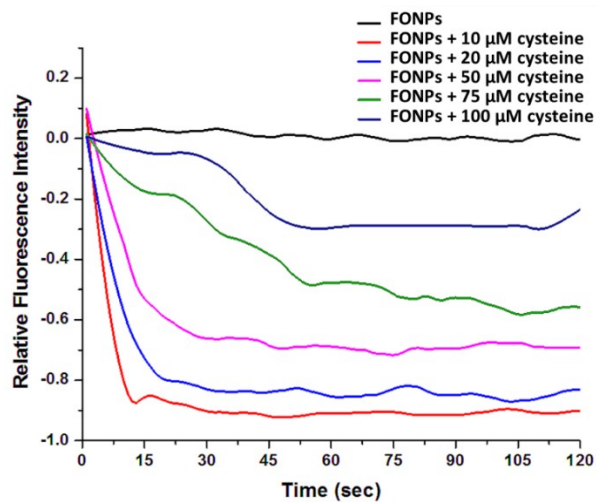

**Figure S6.** Changes in fluorescence as function of time for HNP-Cysteine interaction in full aqueous media

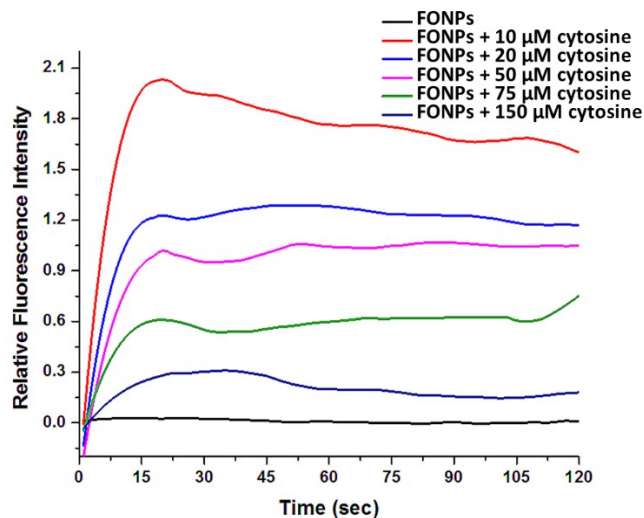

**Figure S7.** Change of fluorescence intensity against time for FONPs-Cytosine interaction in full aqueous medium

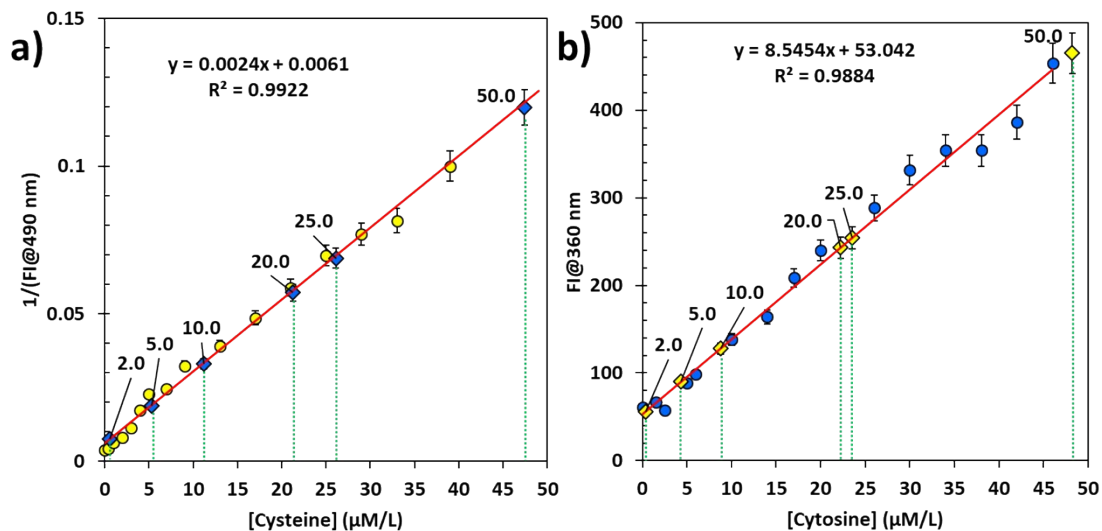

**Figure S8.** Method of validation for quantification: a) cysteine by FONPs, and b) cytosine by FONPs.

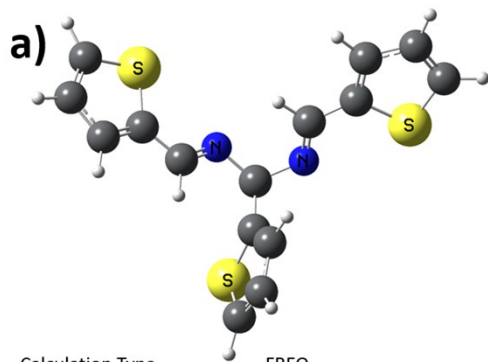

|                    |              |       |
|--------------------|--------------|-------|
| Calculation Type   | FREQ         |       |
| Calculation Method | RB3LYP       |       |
| Basis Set          | 6-311+G(d,p) |       |
| Charge             | 0            |       |
| Spin               | Singlet      |       |
| E(UB3LYP)          | -1882.87     | a.u.  |
| RMS Gradient Norm  | 0.00000423   | a.u.  |
| Imaginary Freq     | 0            |       |
| Dipole Moment      | 5.0697       | Debye |
| Point Group        | C1           |       |

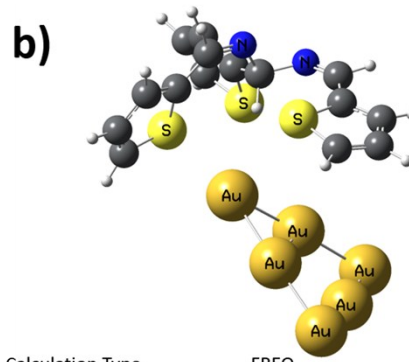

|                    |              |       |
|--------------------|--------------|-------|
| Calculation Type   | FREQ         |       |
| Calculation Method | UB3LYP       |       |
| Basis Set          | 6-311+G(d,p) |       |
| Charge             | 0            |       |
| Spin               | Singlet      |       |
| E(UB3LYP)          | -1531.38     | a.u.  |
| RMS Gradient Norm  | 0.000006     | a.u.  |
| Imaginary Freq     | 0            |       |
| Dipole Moment      | 7.6529       | Debye |
| Point Group        | C1           |       |

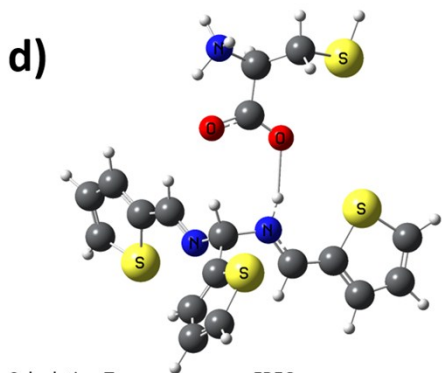

|                    |              |       |
|--------------------|--------------|-------|
| Calculation Type   | FREQ         |       |
| Calculation Method | UB3LYP       |       |
| Basis Set          | 6-311+G(d,p) |       |
| Charge             | 0            |       |
| Spin               | Doublet      |       |
| E(UB3LYP)          | -2604.95     | a.u.  |
| RMS Gradient Norm  | 0.00000535   | a.u.  |
| Imaginary Freq     | 0            |       |
| Dipole Moment      | 20.7310      | Debye |
| Point Group        | C1           |       |

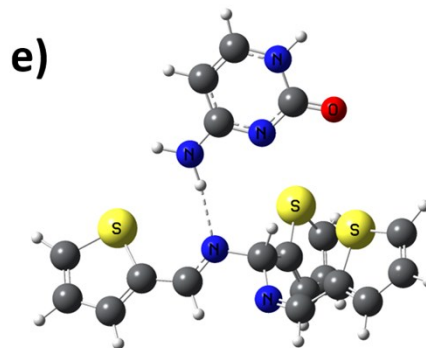

|                    |              |       |
|--------------------|--------------|-------|
| Calculation Type   | FREQ         |       |
| Calculation Method | RB3LYP       |       |
| Basis Set          | 6-311+G(d,p) |       |
| Charge             | 0            |       |
| Spin               | Singlet      |       |
| E(UB3LYP)          | -2277.37     | a.u.  |
| RMS Gradient Norm  | 0.00000940   | a.u.  |
| Imaginary Freq     | 0            |       |
| Dipole Moment      | 6.7679       | Debye |
| Point Group        | C1           |       |

**Figure S9.** DFT optimization-frequency parameters for a) BMTM; b) BMTM-Au<sub>6</sub>; c) BMTM-cysteine; d) BMTM-cytosine obtained with a B3LYP/6-311+G(d,p) basis set.

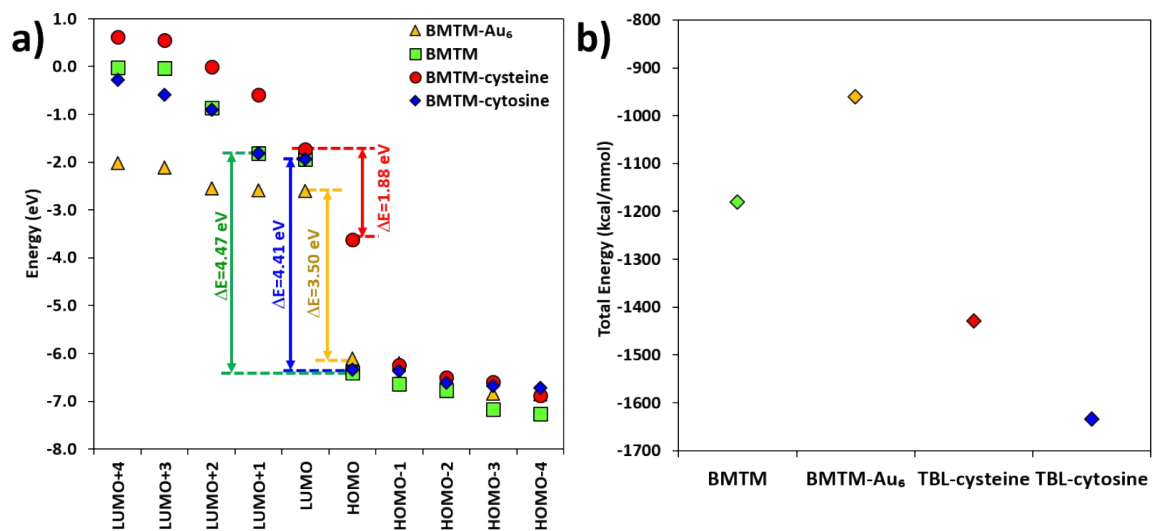

**Figure S10.** a) Frontier molecular energy diagram for BMTM, BMTM-Au<sub>6</sub>, BMTM-cysteine and BMTM-cytosine interaction; b) Total calculated energy for BMTM, BMTM-Au<sub>6</sub>, BMTM-cysteine and BMTM-cytosine interaction.

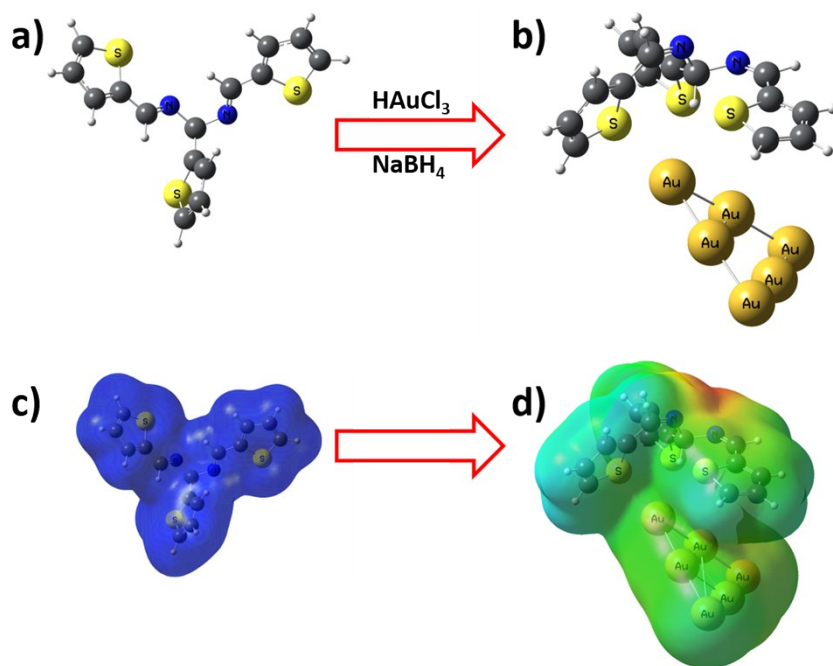

**Figure S11** a) Optimized geometry a) BMTM and b) BMTM-Au<sub>6</sub> in aqueous system; b) electron density mapping of c) BMTM and d) BMTM- Au<sub>6</sub> obtained through B3LYP/LANL2DZ basis set.

**Table S1.** Method of validation for the determination of cysteine and cytosine by FONPs

| Stock concentration<br>[ $\mu\text{M}$ ] | [Cysteine]        |           | [Cytosine]        |           |
|------------------------------------------|-------------------|-----------|-------------------|-----------|
|                                          | [ $\mu\text{M}$ ] | Error (%) | [ $\mu\text{M}$ ] | Error (%) |
| 2.0                                      | 0.57              | 1.6       | 0.35              | 82.6      |
| 5.0                                      | 5.30              | -6.0      | 4.67              | 6.4       |
| 10.0                                     | 11.21             | -12.1     | 8.77              | 12.2      |
| 20.0                                     | 21.28             | -6.4      | 22.23             | -11.1     |
| 25.0                                     | 26.11             | -4.4      | 23.52             | 5.9       |
| 50.0                                     | 47.42             | 5.1       | 48.21             | 3.5       |
| <b>Error average</b>                     | -                 | 7.9       | -                 | 16.6      |

**Table S2.** Recognition of cysteine and cytosine in literature and compared with the present study

| Probing compounds                                                                                      | Technique                        | Detection limit                           | Recognition species                                   | Ref.              |
|--------------------------------------------------------------------------------------------------------|----------------------------------|-------------------------------------------|-------------------------------------------------------|-------------------|
| benzothiazole-based ligand<br>2-(2-hydroxyphenyl) benzothiazole using cysteine<br>an auxiliary reagent | Fluorescence                     | 0.036 $\mu\text{M}$<br>1.16 M             | Zn <sup>2+</sup> and Cd <sup>2+</sup>                 | Ref <sup>1</sup>  |
| Nanohybrid of silica nanoparticles with gold<br>nanoclusters                                           | Fluorescence                     | 0.35 mM.                                  | Cysteine                                              | Ref <sup>2</sup>  |
| N-acetyl-L-cysteine-capped CdTe quantum dots                                                           | Fluorescence                     | -                                         | pancillamine and Cu <sup>2+</sup>                     | Ref <sup>3</sup>  |
| Fingerprint-like pattern DNA-based sensing                                                             | Fluorescence                     | 8.6 nM for L-Cys and<br>7.4 nM for D-Cys, | Thiols                                                | Ref <sup>4</sup>  |
| quinoline based ratiometric compound                                                                   | Two-photon fluorescence          | -                                         | Cysteine and<br>homocysteine                          | Ref <sup>5</sup>  |
| Fluorescein-based compound                                                                             | Colorimetric and<br>fluorescence | 0.12 $\mu\text{M}$<br>0.13 $\mu\text{M}$  | Glutathione and cysteine                              |                   |
| Flavone-based ligand (6-bromo-2-(9-ethyl-9H-<br>carbazol-3-yl)-3-hydroxy-chromen-4-one)                | Fluorescence                     | $4.06 \times 10^{-3}$ $\mu\text{M}$       | Cysteine                                              | Ref <sup>6</sup>  |
| Iminocoumarins based compounds                                                                         | Fluorescence                     | 6.6 nM                                    | cysteine                                              | Ref <sup>7</sup>  |
| fluorophore of 4-amino-7-nitrobenz-2-oxa-1,3-<br>diazole                                               | Fluorescence                     | 26 nM.                                    | Glutathione                                           | Ref <sup>8</sup>  |
| Magnetic Micronanoelectrodes                                                                           | electrochemical                  | 83 $\mu\text{M}$                          | Cysteine                                              | Ref <sup>9</sup>  |
| optical metal based nanoparticles sensor                                                               | Colorimetric                     | $4.54 \times 10^{-10}$ M.                 | Creatinine                                            | Ref <sup>10</sup> |
| Rhodamine-derived probes                                                                               | Fluorescence                     | 1.26 $\mu\text{M}$                        | Cysteine                                              | Ref <sup>11</sup> |
| 8-carboxamidoquinoline derivative with Cu <sup>2+</sup><br>complex                                     | Fluorescence                     | $1.92 \times 10^{-7}$ mol/l               | Cysteine                                              | Ref <sup>12</sup> |
| Chitosan-capped silver nanoparticles:                                                                  | Scanometry                       | $2.1 \times 10^{-6}$ mol L <sup>-1</sup>  | Tryptophan                                            | Ref <sup>13</sup> |
| cinamaldehyde and pyrimidine base probe                                                                | Absorption spectra               | 0.10 M                                    | Hg <sup>2+</sup> and cysteine                         | Ref <sup>14</sup> |
| pyrene pyridoxal cascade compound                                                                      | Fluorescence                     | $1.59 \times 10^{-7}$ M                   | Zn <sup>2+</sup> , hydrogen phosphate<br>and cysteine | Ref <sup>15</sup> |
| molecular imprinted SiO <sub>2</sub> /AuNPs/SiO <sub>2</sub>                                           | electrochemical                  | -                                         | Cysteine                                              | Ref <sup>16</sup> |



|                                                                                          |                                  |                                           |                                           |                   |
|------------------------------------------------------------------------------------------|----------------------------------|-------------------------------------------|-------------------------------------------|-------------------|
| Cyclohexene based shift base ligand                                                      | Colorimetry and fluorescence     | 7.34 nM                                   | isomers<br>Biothiols                      | Ref <sup>17</sup> |
| naphthalimide-functionalized Pillar[5]arene-based Multiresponsive Supramolecular Polymer | Fluorescence                     | -                                         | Cyanide, Hg, and Cysteine                 | Ref <sup>18</sup> |
| Phthalimide-based probe                                                                  | Fluorescence                     | $6 \times 10^{-8}$ M                      | Cysteine                                  | Ref <sup>19</sup> |
| Coumarin-based ligand                                                                    | Fluorescent                      | 47.7 nM                                   | Cysteine                                  | Ref <sup>20</sup> |
| Graphene oxide embedded with Fe(phenanthroline) as dual Reacting-mediated Strategy       | Colorimetry                      | 4.8 $\mu$ M                               | Cysteine                                  | Ref <sup>21</sup> |
| Metal-organic frameworks Fe-MIL-88NH(2)                                                  | fluorescence                     | 1.17 $\mu$ M                              | 6-mercaptopurine                          | Ref <sup>22</sup> |
| nanomaterials of terbium hybrids for the detection of tryptophan                         | Luminiscence                     | -                                         | Tryptophan                                | Ref <sup>23</sup> |
| Cytosine derivatized diethylenetriaminepentaacetic acid (dtpa) and Eu(III) complexes     | fluorescence                     | $5.11 \times 10^{-7}$ mol L <sup>-1</sup> | 6-Thioguanine                             | Ref <sup>24</sup> |
| nitrogen-doped graphene quantum dot-mercury(II)system                                    | fluorescence                     | 1.3 nmol L <sup>-1</sup>                  | Cysteine                                  | Ref <sup>25</sup> |
| magnesium and nitrogen co-doped carbon quantum dots                                      | fluorescence                     | 0.02 $\mu$ M.                             | Cysteine and Hg <sub>2</sub> <sup>+</sup> | Ref <sup>26</sup> |
| global DNA methylation                                                                   | Colorimetry and electrochemistry | -                                         | Methyl cytosine specific antibodies       | Ref <sup>27</sup> |
| 3-(2-hydroxyphenyl)-1-pyrenyl-2-propenone                                                | fluorescence                     | 10 pM/L                                   | Cysteine                                  | Ref <sup>28</sup> |
| Quantum mechanical studies                                                               | DFT                              | -                                         | Cytosine and adenine                      | Ref <sup>29</sup> |
| Pyrene-apped 5-hydroxyisophthalic acid derivative                                        | Colorimetry and Fluorescence     | 32 nM                                     | Cytosine                                  | Ref <sup>30</sup> |
| Picolinamide                                                                             | Biochemical reactions            | -                                         | Nucleobases                               | Ref <sup>31</sup> |
| Gold nanorods vs. gold nanoparticles with molecularly imprinted polymer                  | electrochemical                  | 0.75 ng mL <sup>-1</sup>                  | Cytosine beta-D-arabinoside               | Ref <sup>32</sup> |
| bis(2,2'-bithienyl)methane molecularly imprinted polymer                                 | Electrochemical Fluorescence     | -                                         | 6-thioguanine,                            | Ref <sup>33</sup> |
| hypoxanthine in pyrrolidinyl peptide nucleic acid                                        | fluorescence                     | -                                         | Cytosine                                  | Ref <sup>34</sup> |
| Thiophene based organic nanoparticles decorated with Au NPs                              | Fluorescence                     | 2.12 nM<br>258 nM                         | Cysteine and cytosine                     | Present work      |

**Note:** Yen Wei co workers showed clearly how aggregation-induced emission (AIE) is essential for many biomedical applications; for example, several polymers based on acetylenic<sup>35</sup>, amphiphilic<sup>36</sup>, dye with  $\beta$  cyclodextrin<sup>37</sup>, poly(amino acid)s<sup>38</sup> were prepared and successfully applied to develop cell imaging<sup>39-41</sup> as well as for bio-/chemosensors<sup>42</sup> through AIE. Furthermore, they also adopted several easy methods to prepare luminescent active polymeric nano particles such as (i) non-covalent fabrication methodology<sup>43</sup>; (ii) fluorescent organic nanoparticles by multi-component approach<sup>44-45</sup>; (iii) surface modification strategy such as fluorescent silica nanoparticles via AIE dye<sup>46</sup>; (iv) catalyst-free azide-alkyne click reaction<sup>47</sup> or catalyst-free thiolyne click reaction<sup>48</sup>; (v) ultrasound or microwave assisted multi-component reactions for polymer nanoparticles<sup>49-50-51</sup>; (vi) metal-free photo-initiated process<sup>52</sup>; polymeric nanoparticles (FPNs) via post modification of synthetic polymers<sup>53</sup>; (vii) fluorescent organic nanoparticles via emulsion<sup>54</sup>, and (viii) luminescent hyaluronic acid through AIE<sup>55</sup>. Similarly, nano-diamonds with hyperbranched polymers were studied to use for drug delivery<sup>56</sup>.

**Table S3.** Frontier molecular orbital (FMO) energies

| Molecular<br>Orbital            | BMTM        | BMTM-Au <sub>6</sub> | BMTM-cysteine | BMTM-cytosine |
|---------------------------------|-------------|----------------------|---------------|---------------|
|                                 | Energy (eV) |                      |               |               |
| LUMO+4                          | 0.018       | -2.016               | 0.613         | 0.282         |
| LUMO+3                          | -0.029      | -2.112               | 0.550         | -0.587        |
| LUMO+2                          | -0.866      | -2.547               | -0.011        | -0.904        |
| LUMO+1                          | -1.808      | -2.593               | -0.586        | -1.815        |
| $\Delta E_{\text{LUMO+1-LUMO}}$ | 0.126       | 0.004                | 1.149         | 0.117         |
| LUMO                            | -1.934      | -2.598               | -1.734        | -1.932        |
| $\Delta E_{\text{HOMO-LUMO}}$   | 4.479       | 3.509                | 1.885         | 4.412         |
| HOMO                            | -6.413      | -6.107               | -3.619        | -6.343        |
| $\Delta E_{\text{HOMO-1-HOMO}}$ | 0.223       | 0.102                | 2.633         | 0.021         |
| HOMO-1                          | -6.636      | -6.210               | -6.251        | -6.365        |
| HOMO-2                          | -6.772      | -6.675               | -6.505        | -6.611        |
| HOMO-3                          | -7.166      | -6.843               | -6.597        | -6.679        |
| HOMO-4                          | -7.266      | -6.862               | -6.886        | -6.715        |

## References

- 1 J. Li, Y. H. Chen, T. T. Chen, J. Qiang, Z. J. Zhang, T. W. Wei, W. Zhang, F. Wang, X. Q. Chen, A benzothiazole-based fluorescent probe for efficient detection and discrimination of Zn<sup>2+</sup> and Cd<sup>2+</sup>, using cysteine as an auxiliary reagent, *Sens. Actuator B.*, 2018, **268**, 446-455.
- 2 N. Xu, Y. Q. Yuan, C. W. Lan, W. Q. Wei, L. Meng, L. Z. Fan, A novel dual-emission fluorescent nanohybrid containing silica nanoparticles and gold nanoclusters for ratiometric determination of cysteine based on turn-on fluorescence strategy, *New J. Chem.*, 2018, **42**, 10092-10099.
- 3 Y. M. Huang, J. D. Yang, H. Y. Yuan, Y. Guo, X. Q. Zeng, J. W. Cheng, Y. H. Zhang, A novel competitive-displacement fluorescence assay for L-penicillamine based on the reaction between the target and N-acetyl-L-cysteine-capped CdTe quantum dots for copper ions, *Anal. Method.*, 2018, **10**, 2263-2271.
- 4 H. Qiu, F. Pu, X. Ran, Y. Q. Song, C. Q. Liu, J. S. Ren, X. G. Qu, Fingerprint-like pattern for recognition of thiols, *Sens. Actuator B.*, 2018, **260**, 183-188.
- 5 Q. Q. Wu, K. N. Wang, Z. A. Wang, Y. T. Sun, D. X. Cao, Z. Q. Liu, R. F. Guan, S. F. Zhao, X. Y. Yu, Two 3-hydroxyflavone derivatives as two-photon fluorescence turn-on chemosensors for cysteine and homocysteine in living cells, *Talanta*, 2018, **181**, 118-124.
- 6 H. Ren, J. L. Zhou, X. C. Dong, W. L. Zhao, A simple, water soluble flavone-based fluorescent probe for fast detection of Cys, *J. Photochem. Photobiol.A-Chem.*, 2018, **355**, 72-77.
- 7 X. J. Liu, D. L. Yang, W. Q. Chen, L. Yang, F. P. Qi, X. Z. Song, A red-emitting fluorescent probe for specific detection of cysteine over homocysteine and glutathione with a large Stokes shift, *Sen. Actuator B-Chem.*, 2016, **234**, 27-33.
- 8 J. L. Zhou, J. Zhang, H. Ren, X. C. Dong, X. Zheng, W. L. Zhao, A turn-on fluorescent probe for selective detection of glutathione using trimethyl lock strategy, *J. Photochem. Photobiol. A.Chem.*, 2018, **355**, 94-100.

- 9 H. F. Zhou, G. X. Ran, J. F. Masson, C. Wang, Y. Zhao, Q. J. Song, Rational Design of Magnetic Micronanoelectrodes for Recognition and Ultrasensitive Quantification of Cysteine Enantiomers, *Anal. Chem.*, 2018, **90**, 3374-3381.
- 10 U. Sivasankaran, T. C. Jos, K. G. Kumar, Selective recognition of creatinine - Development of a colorimetric sensor, *Anal. Biochem.*, 2018, **544**, 1-6.
- 11 Y. Q. Zhao, Y. Xing, L. H. Li, J. J. Ma, Characterization and cysteine sensing performance of nanocomposites based on up-conversion excitation host and rhodamine-derived probes, *Spectrochim. Acta A.*, 2018, **191**, 134-142.
- 12 G. P. Chai, Q. W. Liu, Q. Fei, J. L. Zhang, X. X. Sun, H. Y. Shan, G. D. Feng, Y. F. Huan, A selective and sensitive fluorescent sensor for cysteine detection based on bi-8-carboxamidoquinoline derivative and Cu<sup>2+</sup> complex, *Lumin.*, 2018, **33**, 153-160.
- 13 M. Jafari, J. Tashkhourian, G. Absalan, Chiral recognition of tryptophan enantiomers using chitosan-capped silver nanoparticles: Scanometry and spectrophotometry approaches, *Talanta*, 2018, **178**, 870-878.
- 14 M. Jung, C. Kim, R. G. Harrison, A dual sensor selective for Hg<sup>2+</sup> and cysteine detection, *Sens. Actuator B-Chem.*, 2018, **255**, 2756-2763.
- 15 Y. Upadhyay, T. Anand, L. T. Babu, P. Paira, G. Crisponi, S. K. A. Kumar, R. Kumar, S. K. Sahoo, Three-in-one type fluorescent sensor based on a pyrene pyridoxal cascade for the selective detection of Zn(II), hydrogen phosphate and cysteine, *Dalton Trans.*, 2018, **47**, 742-749.
- 16 J. Zhang, W. S. Tan, Y. X. Tao, L. H. Deng, Y. Qin, Y. Kong, A novel electrochemical chiral interface based on sandwich-structured molecularly imprinted SiO<sub>2</sub>/AuNPs/SiO<sub>2</sub> for enantioselective recognition of cysteine isomers, *Electrochem. Commun.*, 2018, **86**, 57-62.
- 17 M. Z. Zhang, H. H. Han, S. Z. Zhang, C. Y. Wang, Y. X. Lu, W. H. Zhu, A new colorimetric and fluorescent probe with a large Stokes shift for rapid and specific detection of biothiols and its application in living cells, *J. Mater. Chem. B*, 2017, **5**, 8780-8785.
- 18 Q. Lin, K. P. Zhong, J. H. Zhu, L. Ding, J. X. Su, H. Yao, T. B. Wei, Y. M. Zhang, Iodine Controlled Pillar 5 arene-Based Multiresponsive Supramolecular Polymer for Fluorescence Detection of Cyanide, Mercury, and Cysteine, *Macromolecules*, 2017, **50**, 7863-7871.
- 19 Y. M. Shen, X. Y. Zhang, Y. Y. Zhang, C. X. Zhang, J. L. Jin, H. T. Li, A new simple phthalimide-based fluorescent probe for highly selective cysteine and bioimaging for living cells, *Spectrochim. Acta A.*, 2017, **185**, 371-375.
- 20 R. F. Zeng, J. S. Lan, X. D. Li, H. F. Liang, Y. Liao, Y. J. Lu, T. Zhang, Y. Ding, A Fluorescent Coumarin-Based Probe for the Fast Detection of Cysteine with Live Cell Application, *Molecules*, 2017, **22**.
- 21 H. H. Rao, Y. Li, G. L. Zhang, Z. H. Xue, G. H. Zhao, S. Y. Li, X. Z. Du, A New Colorimetric Sensor for Cysteine Determination Based on Dual Reacting-mediated Strategy, *Bull. Korean Chem. Soc.*, 2017, **38**, 1023-1027.
- 22 Z. J. Sun, Y. L. Liu, Y. F. Li, Selective recognition of 6-mercaptopurine based on luminescent metal-organic frameworks Fe-MIL-88NH(2), *Spectrochim. Acta A.*, 2015, **139**, 296-301.
- 23 S. T. Pang, Z. Zhou, Q. M. Wang, Smart OD nanomaterials assembled by green luminescent terbium hybrids for the detection of tryptophan, *J. Nanoparticle Res.*, 2013, **15**.
- 24 F. Y. Tian, F. Yang, X. Q. Jiang, X. K. Dou, G. H. Liu, P. P. Ren, J. Wang, Y. T. Song, Z. Q. Xing, G. X. Han, Cytosine derivatized diethylenetriaminepentaacetic acid (dtpa) and Eu(III) complexes for selective recognition of 6-Thioguanine, *Sens. Actuators B-Chem.*, 2017, **247**, 374-383.
- 25 Z. Z. Liu, Y. Gong, Z. F. Fan, Cysteine detection using a high-fluorescence sensor based on a nitrogen-doped graphene quantum dot-mercury(II) system, *J. Lumin.*, 2016, **175**, 129-134.

- 26 T. Liu, N. Li, J. X. Dong, H. Q. Luo, N. B. Li, Fluorescence detection of mercury ions and cysteine based on magnesium and nitrogen co-doped carbon quantum dots and IMPLICATION logic gate operation, *Sens. Actuator B-Chem.*, 2016, **231**, 147-153.
- 27 M. H. Haque, R. Bhattacharjee, M. N. Islam, V. Gopalan, N. T. Nguyen, A. K. Lam, M. J. A. Shiddiky, Colorimetric and electrochemical quantification of global DNA methylation using a methyl cytosine-specific antibody, *Analyst*, 2017, **142**, 1900-1908.
- 28 B. K. Rani, S. A. John, A novel pyrene based fluorescent probe for selective detection of cysteine in presence of other bio-thiols in living cells, *Biosens. Bioelectronic.*, 2016, **83**, 237-242.
- 29 J. Basumatary, B. Bezbaruah, R. Kalita, T. K. Barman, C. Medhi, Quantum mechanical studies on the existence of AC mismatches through prototopic tautomerization pathway in adenine and cytosine recognition, *J. Theor. Comput. Chem.*, 2017, **16**.
- 30 H. S. Sarkar, S. Das, D. Mandal, M. R. Uddin, S. Mandal, P. Sahoo, "Turn-on" fluorescence sensing of cytosine: development of a chemosensor for quantification of cytosine in human cancer cells, *RSC Adv.*, 2017, **7**, 54008-54012.
- 31 R. A. Dengale, S. R. Thopate, T. Lonnberg, Metal-Dependent Nucleobase Recognition by Picolinamide, *Chempluschem*, 2016, **81**, 978-984.
- 32 B. B. Prasad, R. Singh, A. Kumar, Gold nanorods vs. gold nanoparticles: application in electrochemical sensing of cytosine beta-D-arabinoside using metal ion mediated molecularly imprinted polymer, *RSC Adv.*, 2016, **6**, 80679-80691.
- 33 T. P. Huynh, A. Wojnarowicz, M. Sosnowska, S. Srebnik, T. Benincori, F. Sanniccolo, F. D'Souza, W. Kutner, Cytosine derivatized bis(2,2'-bithienyl)methane molecularly imprinted polymer for selective recognition of 6-thioguanine, an antitumor drug, *Biosens. Bioelectronic.*, 2015, **70**, 153-160.
- 34 C. Vilaivan, W. Srinarang, N. Yotapan, W. Mansawat, C. Boonlua, J. Kawakami, Y. Yamaguchi, Y. Tanak, T. Vilaivan, Specific recognition of cytosine by hypoxanthine in pyrrolidiny peptide nucleic acid, *Org. Biomolecular Chem.*, 2013, **11**, 2310-2317.
- 35 J. Z. Liu, J. W. Y. Lam, B. Z. Tang, Acetylenic Polymers: Syntheses, Structures, and Functions, *Chemical Reviews*, 2009, **109**, 5799-5867.
- 36 Z. Long, M. Y. Liu, K. Wang, F. J. Deng, D. Z. Xu, L. J. Liu, Y. Q. Wan, X. Y. Zhang, Y. Wei, Facile synthesis of AIE-active amphiphilic polymers: Self-assembly and biological imaging applications, *Mater. Sci. Eng. C.*, 2016, **66**, 215-220.
- 37 H. Y. Huang, D. Z. Xu, M. Y. Liu, R. M. Jiang, L. C. Mao, Q. Huang, Q. Wan, Y. Q. Wen, X. Y. Zhang, Y. Wei, Direct encapsulation of AIE-active dye with beta cyclodextrin terminated polymers: Self-assembly and biological imaging, *Mate. Sci. Eng. C.*, 2017, **78**, 862-867.
- 38 J. W. Tian, R. M. Jiang, P. Gao, D. Z. Xu, L. C. Mao, G. J. Zeng, M. Y. Liu, F. J. Deng, X. Y. Zhang, Y. Wei, Synthesis and cell imaging applications of amphiphilic AIE-active poly(amino acid)s, *Mater. Sci. Eng. C.*, 2017, **79**, 563-569.
- 39 R. M. Jiang, H. Liu, M. Y. Liu, J. W. Tian, Q. Huang, H. Y. Huang, Y. Q. Wen, Q. Y. Cao, X. Y. Zhang, Y. Wei, A facile one-pot Mannich reaction for the construction of fluorescent polymeric nanoparticles with aggregation-induced emission feature and their biological imaging, *Mater. Sci. Eng. C.*, 2017, **81**, 416-421.
- 40 X. Y. Zhang, K. Wang, M. Y. Liu, X. Q. Zhang, L. Tao, Y. W. Chen, Y. Wei, Polymeric AIE-based nanoprobe for biomedical applications: recent advances and perspectives, *Nanoscale*, 2015, **7**, 11486-11508.
- 41 X. Y. Zhang, X. Q. Zhang, B. Yang, M. Y. Liu, W. Y. Liu, Y. W. Chen, Y. Wei, Polymerizable aggregation-induced emission dye-based fluorescent nanoparticles for cell imaging applications, *Polym. Chem.*, 2014, **5**, 356-360.

- 42 L. C. Mao, Y. Z. Liu, S. J. Yang, Y. X. Li, X. Y. Zhang, Y. Wei, Recent advances and progress of fluorescent bio-/chemosensors based on aggregation-induced emission molecules, *Dyes Pigment.*, 2019, **162**, 611-623.
- 43 Q. Wan, Q. Huang, M. Y. Liu, D. Z. Xu, H. Y. Huang, X. Y. Zhang, Y. Wei, Aggregation-induced emission active luminescent polymeric nanoparticles: Non-covalent fabrication methodologies and biomedical applications, *Appl. Mater. Today*, 2017, **9**, 145-160.
- 44 Z. Long, M. Y. Liu, R. M. Jiang, Q. Wan, L. C. Mao, Y. Q. Wan, F. J. Deng, X. Y. Zhang, Y. Wei, Preparation of water soluble and biocompatible AIE-active fluorescent organic nanoparticles via multicomponent reaction and their biological imaging capability, *Chem. Eng. J.*, 2017, **308**, 527-534.
- 45 Z. Long, L. C. Mao, M. Y. Liu, Q. Wan, Y. Q. Wan, X. Y. Zhang, Y. Wei, Marrying multicomponent reactions and aggregation-induced emission (AIE): new directions for fluorescent nanoprobe, *Polym. Chem.*, 2017, **8**, 5644-5654.
- 46 L. Huang, S. J. Yang, J. Y. Chen, J. W. Tian, Q. Huang, H. Y. Huang, Y. Q. Wen, F. J. Deng, X. Y. Zhang, Y. Wei, A facile surface modification strategy for fabrication of fluorescent silica nanoparticles with the aggregation-induced emission dye through surface-initiated cationic ring opening polymerization, *Mater. Sci. Eng. C.*, 2019, **94**, 270-278.
- 47 R. M. Jiang, M. Y. Liu, T. T. Chen, H. Y. Huang, Q. Huang, J. W. Tian, Y. Q. Wen, Q. Y. Cao, X. Y. Zhang, Y. Wei, Facile construction and biological imaging of cross-linked fluorescent organic nanoparticles with aggregation-induced emission feature through a catalyst-free azide-alkyne click reaction, *Dyes Pigment.*, 2018, **148**, 52-60.
- 48 Q. Y. Cao, R. M. Jiang, M. Y. Liu, Q. Wan, D. Z. Xu, J. W. Tian, H. Y. Huang, Y. Q. Wen, X. Y. Zhang, Y. Wei, Preparation of AIE-active fluorescent polymeric nanoparticles through a catalyst-free thiol-yne click reaction for bioimaging applications, *Mater. Sci. Eng. C.*, 2017, **80**, 411-416.
- 49 R. M. Jiang, M. Y. Liu, H. Y. Huang, L. C. Mao, Q. Huang, Y. Q. Wen, Q. Y. Cao, J. W. Tian, X. Y. Zhang, Y. Wei, Facile fabrication of organic dyed polymer nanoparticles with aggregation-induced emission using an ultrasound-assisted multicomponent reaction and their biological imaging, *J. Colloid Interface Sci.*, 2018, **519**, 137-144.
- 50 Q. Y. Cao, R. M. Jiang, M. Y. Liu, Q. Wan, D. Z. Xu, J. W. Tian, H. Y. Huang, Y. Q. Wen, X. Y. Zhang, Y. Wei, Microwave-assisted multicomponent reactions for rapid synthesis of AIE-active fluorescent polymeric nanoparticles by post-polymerization method, *Mater. Sci. Eng. C.*, 2017, **80**, 578-583.
- 51 R. M. Jiang, M. Y. Liu, C. Li, Q. Huang, H. Y. Huang, Q. Wan, Y. Q. Wen, Q. Y. Cao, X. Y. Zhang, Y. Wei, Facile fabrication of luminescent polymeric nanoparticles containing dynamic linkages via a one-pot multicomponent reaction: Synthesis, aggregation-induced emission and biological imaging, *Mater. Sci. Eng. C*, 2017, **80**, 708-714.
- 52 J. Y. Chen, M. Y. Liu, Q. Huang, L. Huang, H. Y. Huang, F. J. Deng, Y. Q. Wen, J. W. Tian, X. Y. Zhang, Y. Wei, Facile preparation of fluorescent nanodiamond-based polymer composites through a metal-free photo-initiated RAFT process and their cellular imaging, *Chem. Eng. J.*, 2018, **337**, 82-90.
- 53 Y. Z. Liu, L. C. Mao, X. H. Liu, M. Y. Liu, D. Z. Xu, R. M. Jiang, F. J. Deng, Y. X. Li, X. Y. Zhang, Y. Wei, A facile strategy for fabrication of aggregation-induced emission (AIE) active fluorescent polymeric nanoparticles (FPNs) via post modification of synthetic polymers and their cell imaging, *Mater. Sci. Eng. C.*, 2017, **79**, 590-595.
- 54 X. Y. Zhang, X. Q. Zhang, B. Yang, M. Y. Liu, W. Y. Liu, Y. W. Chen, Y. Wei, Fabrication of aggregation induced emission dye-based fluorescent organic nanoparticles via emulsion polymerization and their cell imaging applications, *Polym. Chem.*, 2014, **5**, 399-404.

- 55 H. Y. Huang, M. Y. Liu, Q. Wan, R. M. Jiang, D. Z. Xu, Q. Huang, Y. Q. Wen, F. J. Deng, X. Y. Zhang, Y. Wei, Facile fabrication of luminescent hyaluronic acid with aggregation-induced emission through formation of dynamic bonds and their theranostic applications, *Mater. Sci. Eng. C.*, 2018, **91**, 201-207.
- 56 H. Y. Huang, M. Y. Liu, R. M. Jiang, J. Y. Chen, L. C. Mao, Y. Q. Wen, J. W. Tian, N. G. Zhou, X. Y. Zhang, Y. Wei, Facile modification of nanodiamonds with hyperbranched polymers based on supramolecular chemistry and their potential for drug delivery, *J. Colloid Interface Sci.*, 2018, **513**, 198-204.
